# Supplementary material for: New effort to synthesize star isotactic polypropylene
Source: Royal Society of Chemistry journal article supplement (doi:10.1039/c8py00318a), 2018-01-01
Supplement: c8py00318a1.pdf [file c8py00318a1.pdf]

## Supporting Information

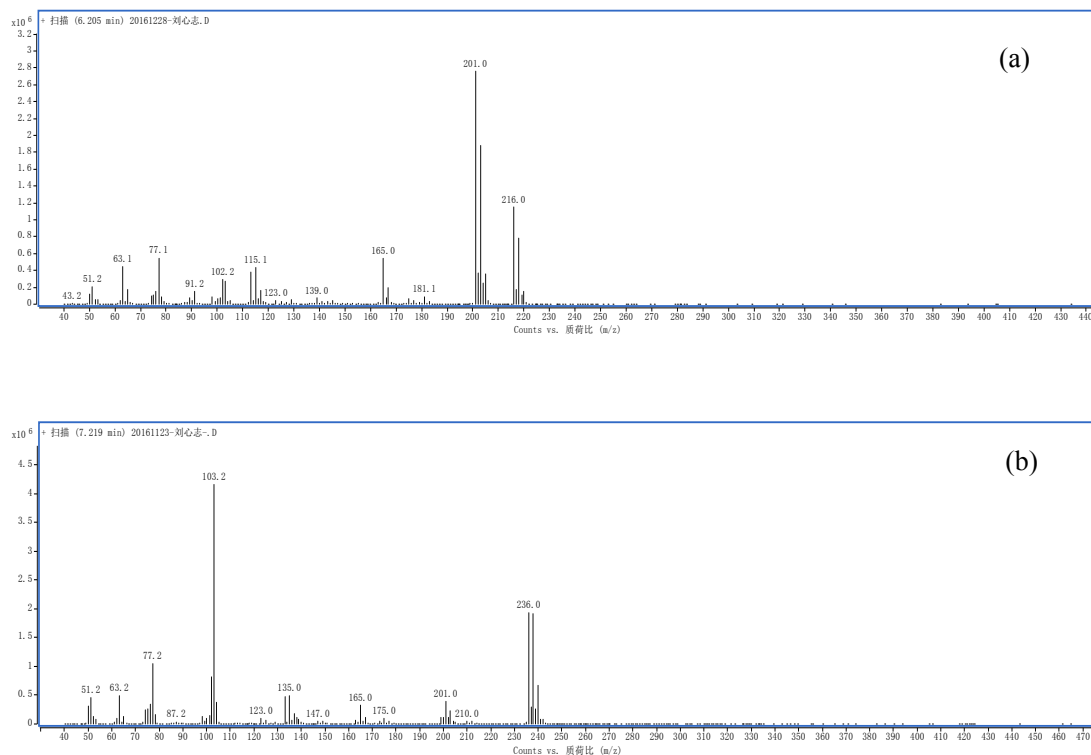

Figure S1 MASS spectra of (a) (p-vinylphenyl)methyldichlorosilane (**M1**) and (b) (p-vinylphenyl)trichlorosilane (**M2**)

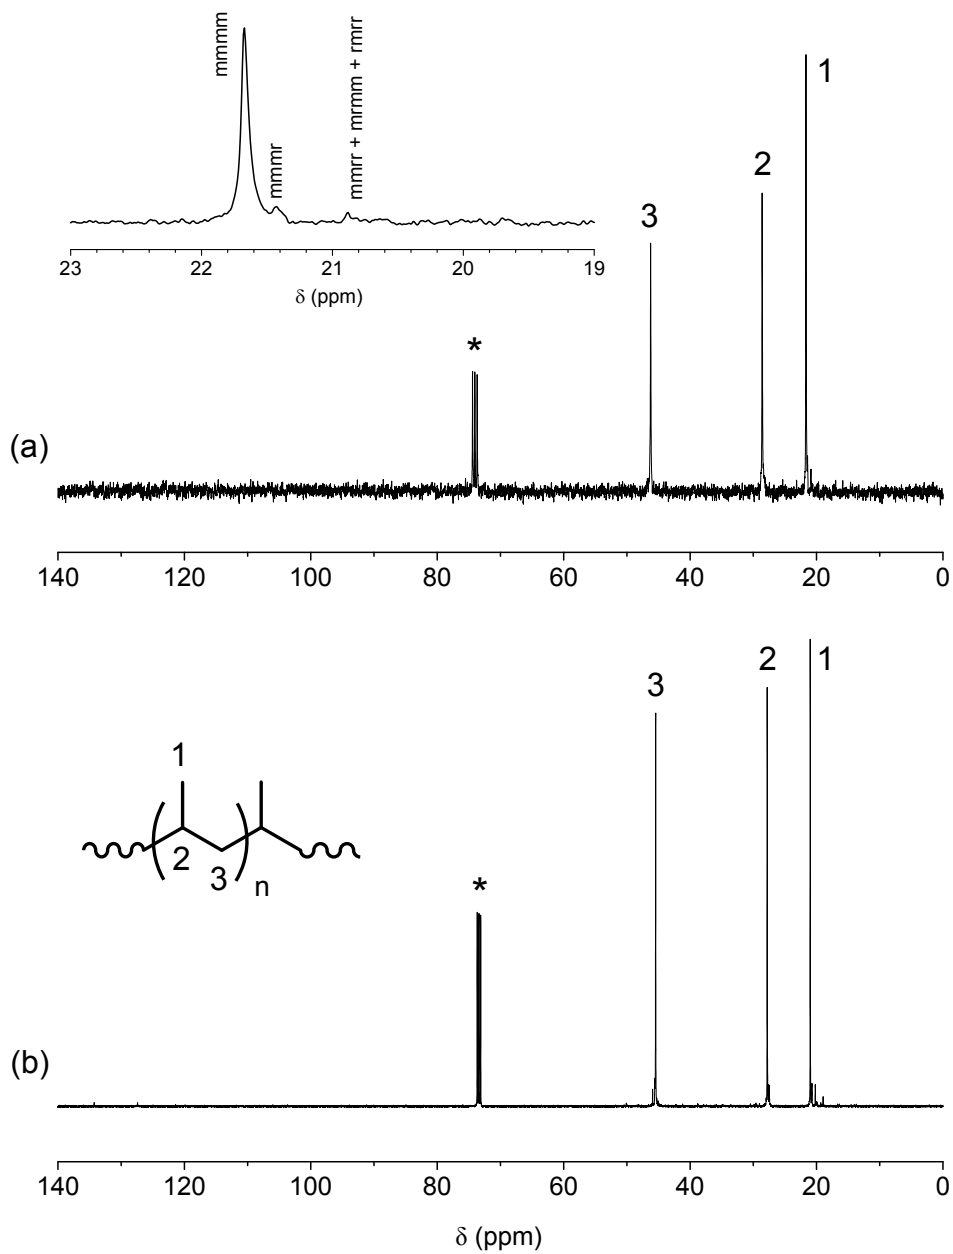

Figure S2  $^{13}\text{C}$ -NMR spectra of (a) the starting  $\text{CH}_3\text{OSi}$ -terminated *i*PP polymer M2-4 and (b) the polymer S2-4 after the intermolecular elimination reaction proceeded for 24h

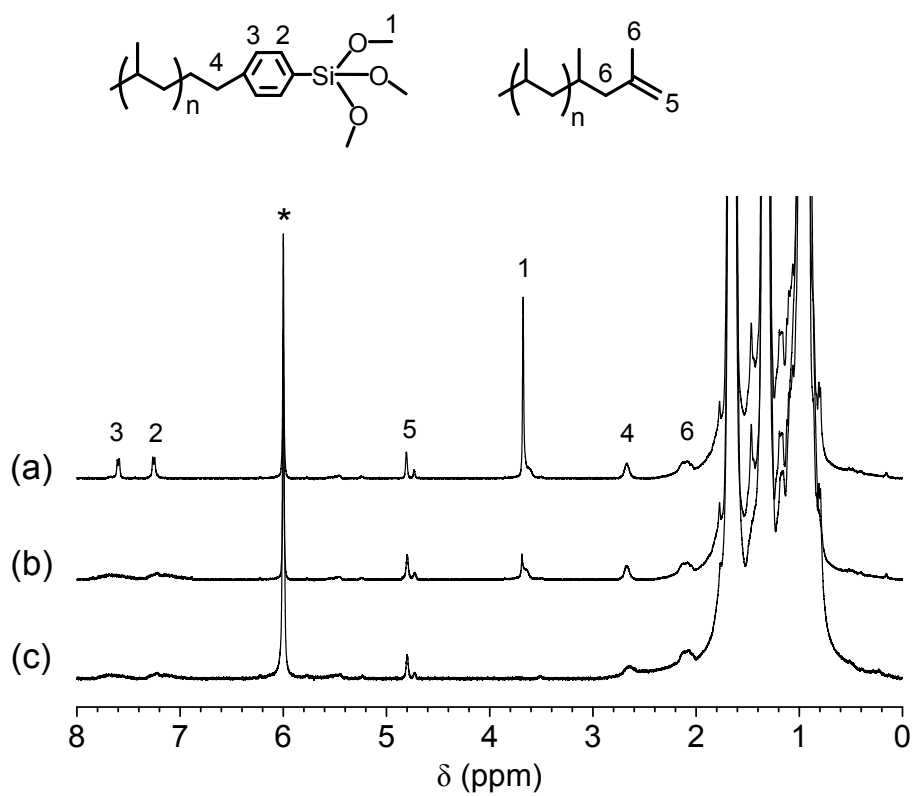

Figure S3 <sup>1</sup>H-NMR spectra of (a) the starting polymer M2-4 with -SiOCH<sub>3</sub> group, (b) the polymer after the -SiOCH<sub>3</sub> group reacted for 15 min, and (c) the polymer after the -SiOCH<sub>3</sub> group reacted for 1 h

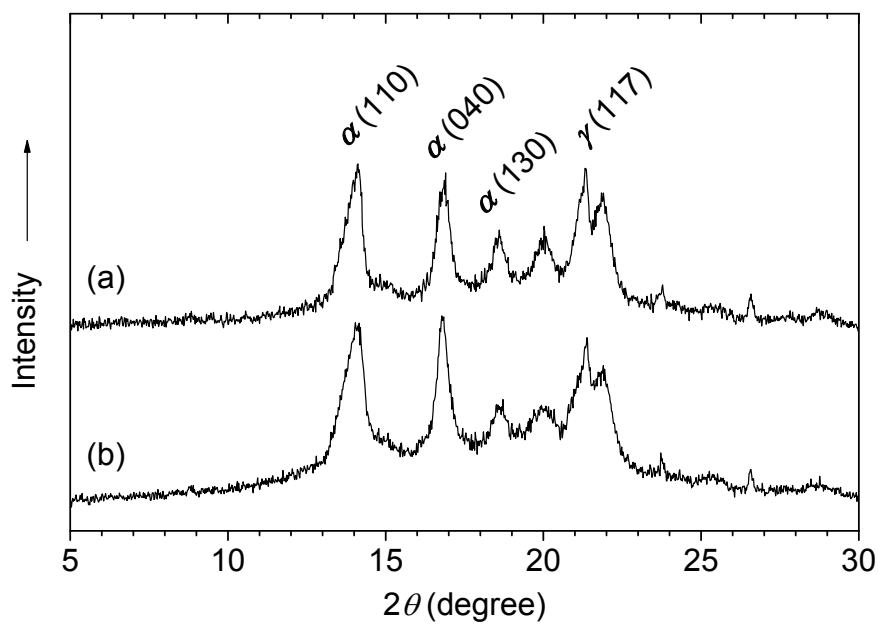

Figure S4 WAXD patterns of (a) the starting CH<sub>3</sub>OSi-terminated *i*PP polymer M2-4 and (b) the polymer S2-4 after the intermolecular elimination reaction proceeded for 24h
